# Supplementary material
Source: publisher site journal article supplement (https://static.cambridge.org/content/id/urn:cambridge.org:id:article:S1047198700012936/resource/name/constituencyprefs_appendix_blinded.zip)

## Model 1

## Model 2

### Model 3

SPD

Constant  $\alpha^0$

Log inverse area  $\beta^{\text{area}}$

Variance  $\sigma_v^2$

Variance  $\sigma_\phi^2$

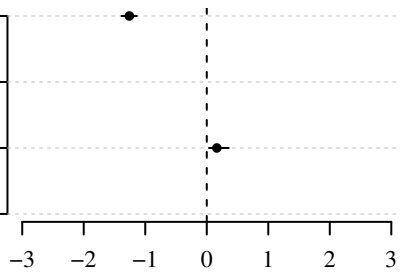

FDP

Constant  $\alpha^0$

Log inverse area  $\beta^{\text{area}}$

Variance  $\sigma_v^2$

Variance  $\sigma_\phi^2$

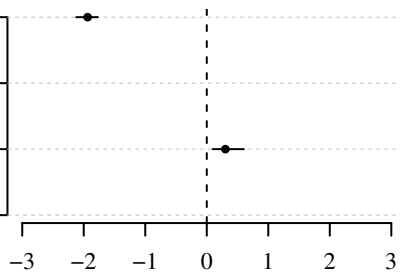

CDU/CSU

Constant  $\alpha^0$

Log inverse area  $\beta^{\text{area}}$

Variance  $\sigma_v^2$

Variance  $\sigma_\phi^2$

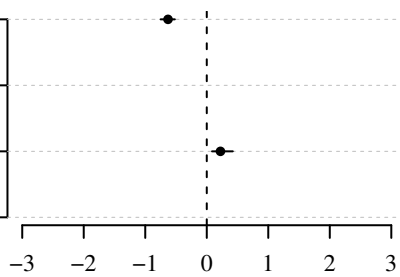

## Die Linke

Constant  $\alpha^0$

Log inverse area  $\beta^{\text{area}}$

Variance  $\sigma_v^2$

Variance  $\sigma_\phi^2$

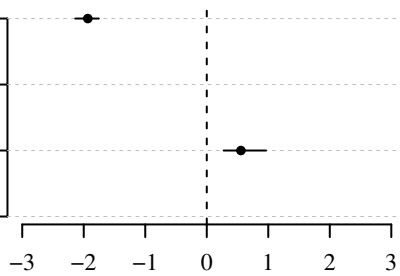

B90/Die Grünen

Constant  $\alpha^0$

Log inverse area  $\beta^{\text{area}}$

Variance  $\sigma_v^2$

Variance  $\sigma_\phi^2$

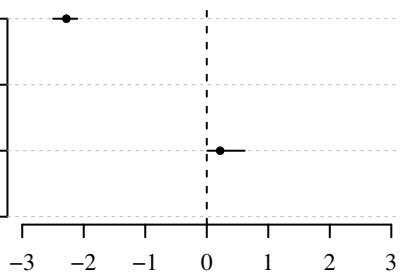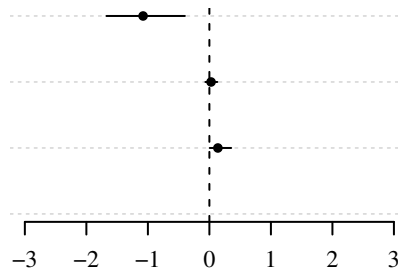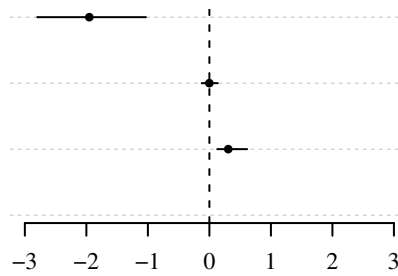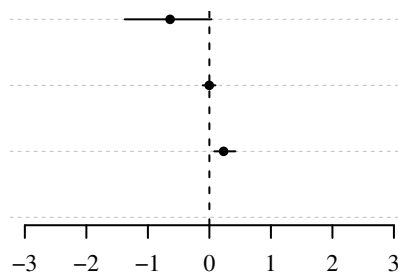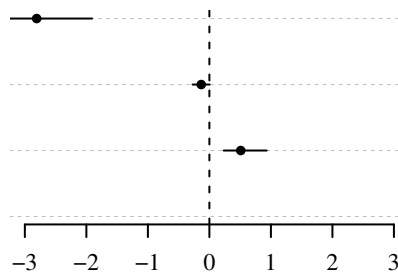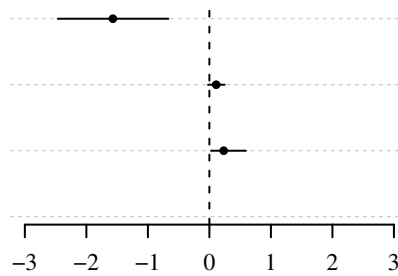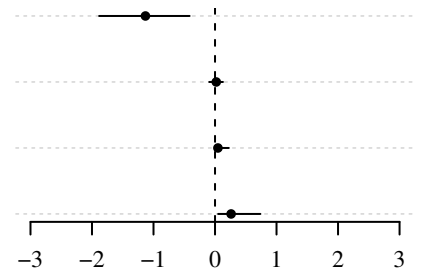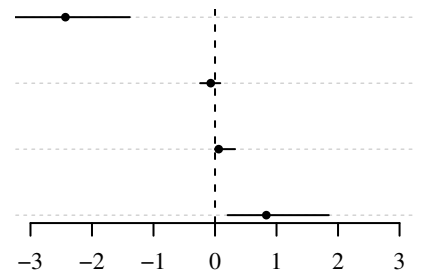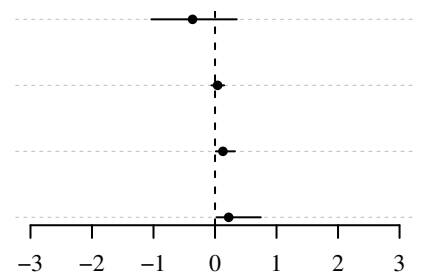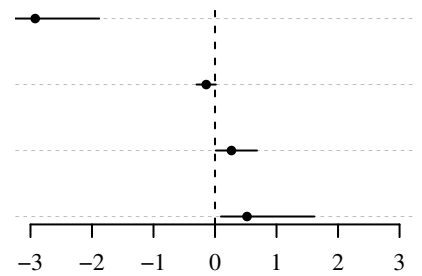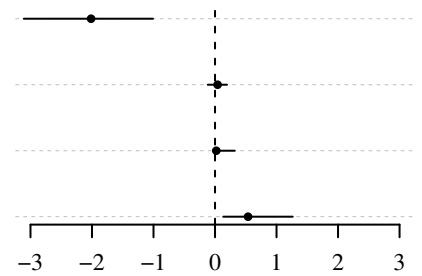

Supplement: Supplementary file 3 [file constituencyprefs_appendix_blinded.zip]
