# Supplementary material
Source: publisher site journal article supplement (https://static.cambridge.org/content/id/urn:cambridge.org:id:article:S1047198700012936/resource/name/constituencyprefs_appendix_blinded.zip)
Supplement: Supplementary file 4 [file constituencyprefs_appendix_blinded.zip]

Direct

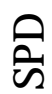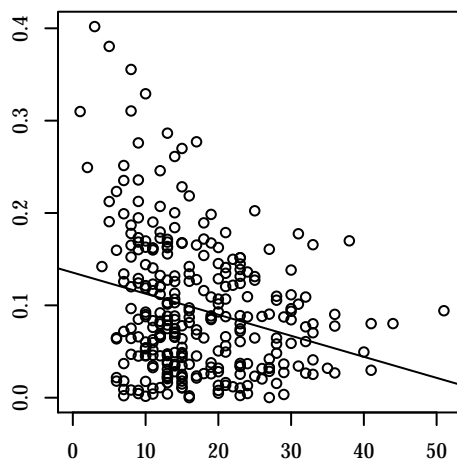

## Model 1

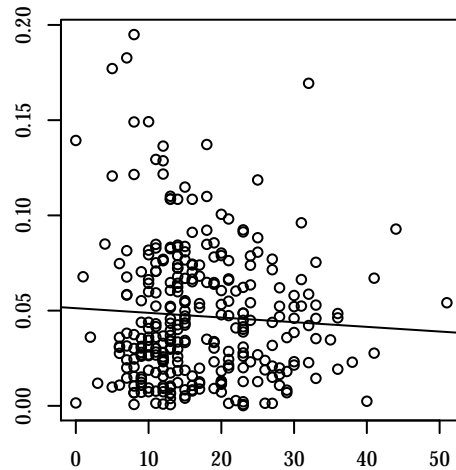

## Model 2

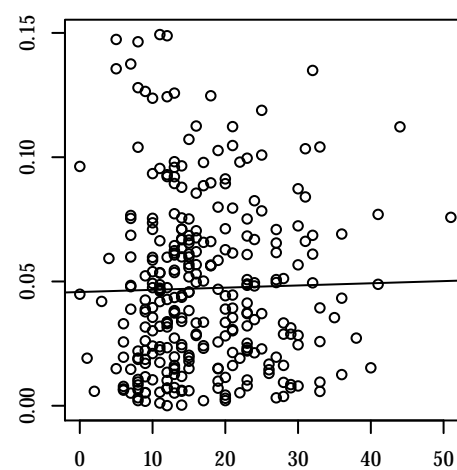

### Model 3

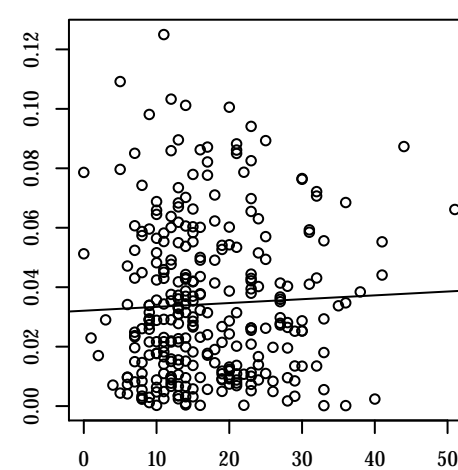

FDP

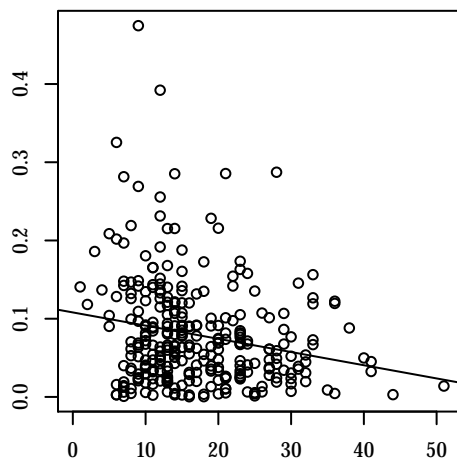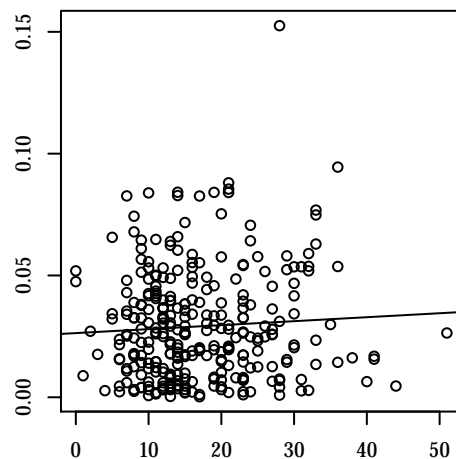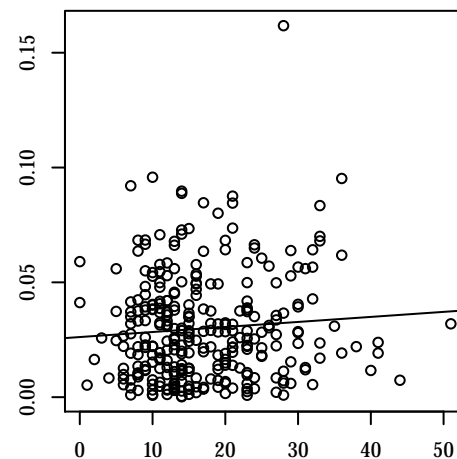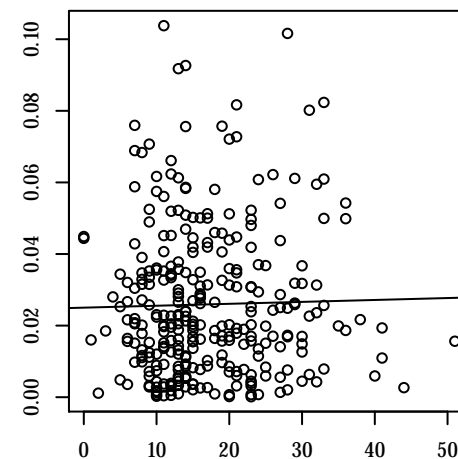

CDU/CSU

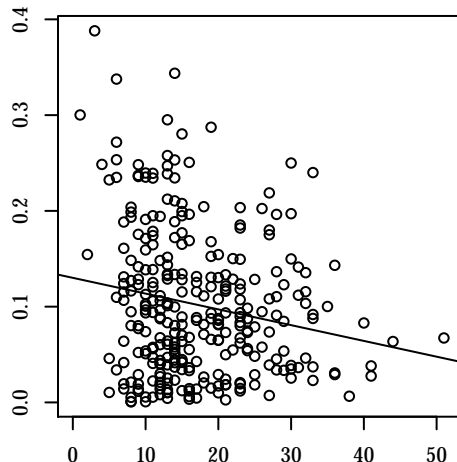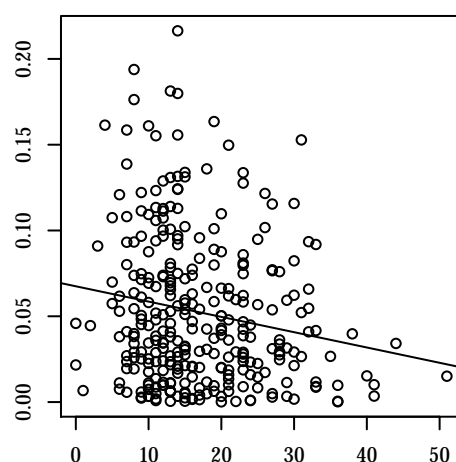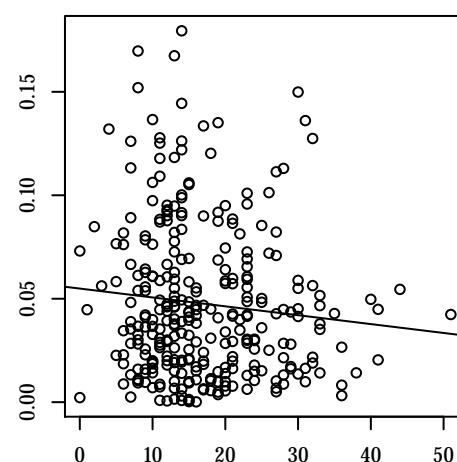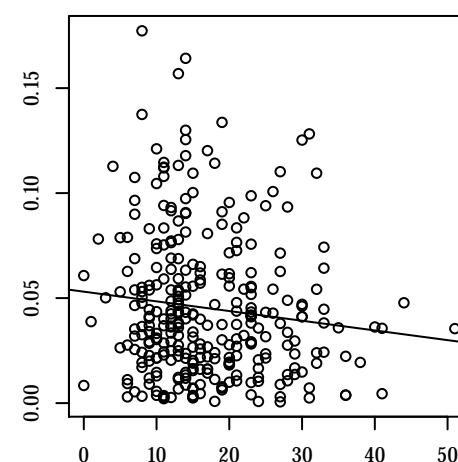

# Die Linke

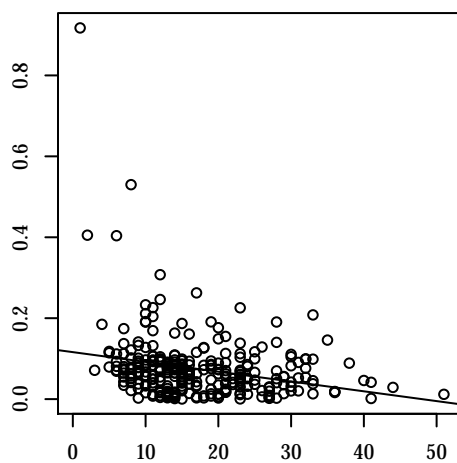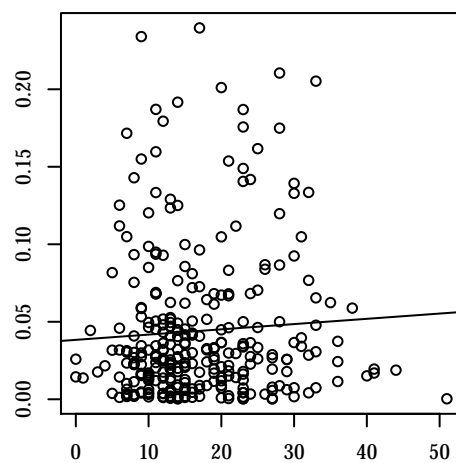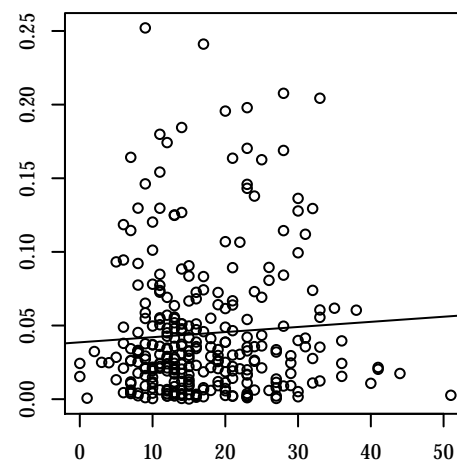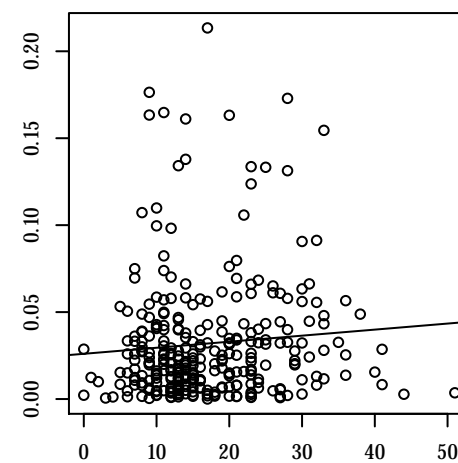

# B90/Die Grünen

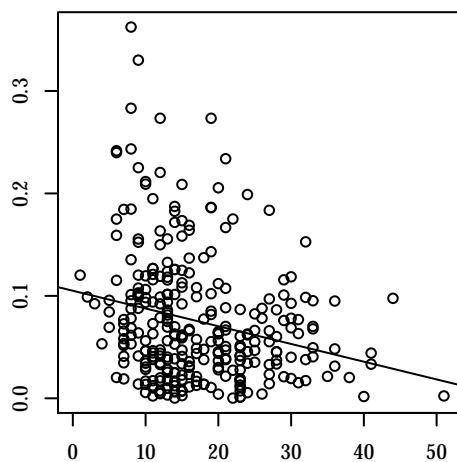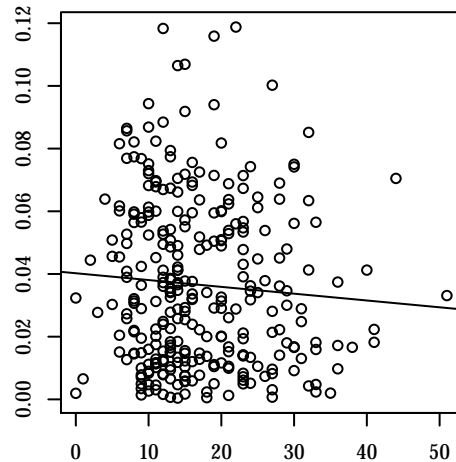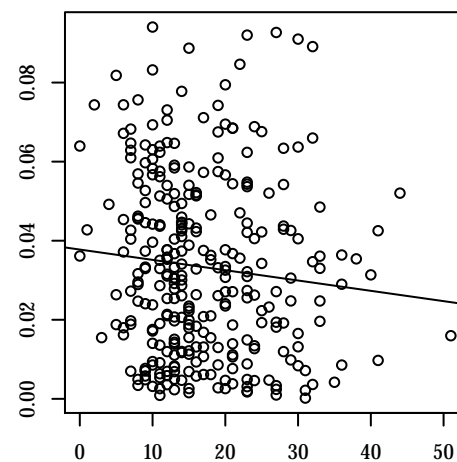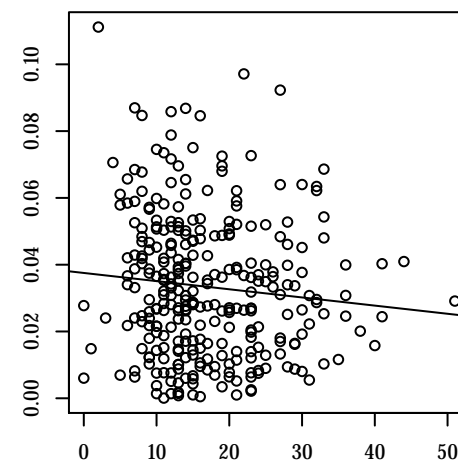

No. of observations in district

No. of observations in district

No. of observations in district

No. of observations in district
