# Supplementary material
Source: publisher site journal article supplement (https://static.cambridge.org/content/id/urn:cambridge.org:id:article:S1047198700012936/resource/name/constituencyprefs_appendix_blinded.zip)

SPD

Pooled

Face-to-face

CATI

FDP

CDU/CSU

Die Linke

B90/Die Grünen

MAE

No. of observations in neighbor districts

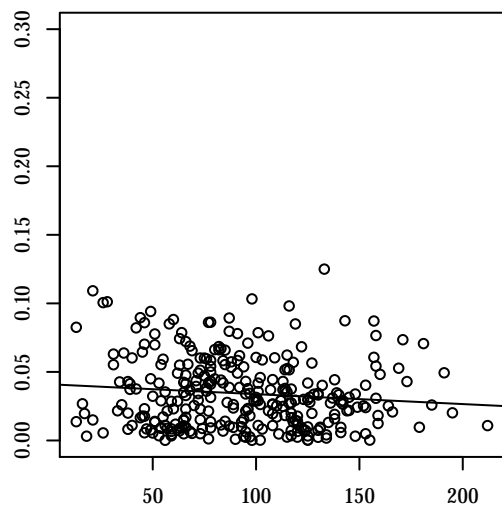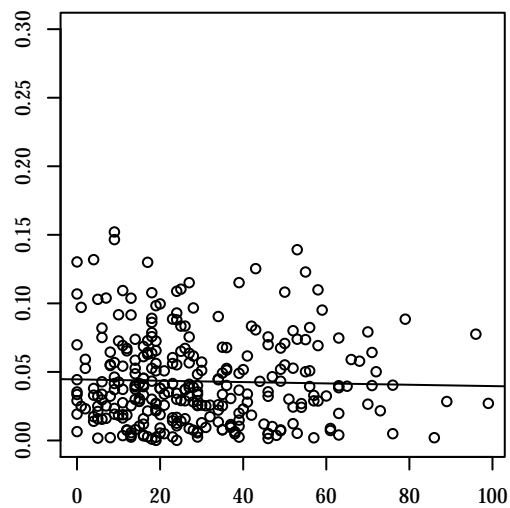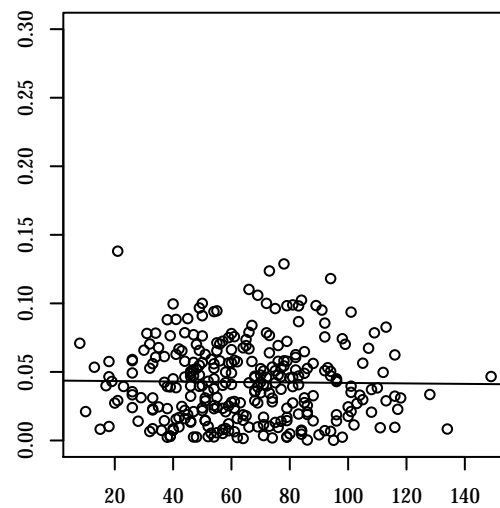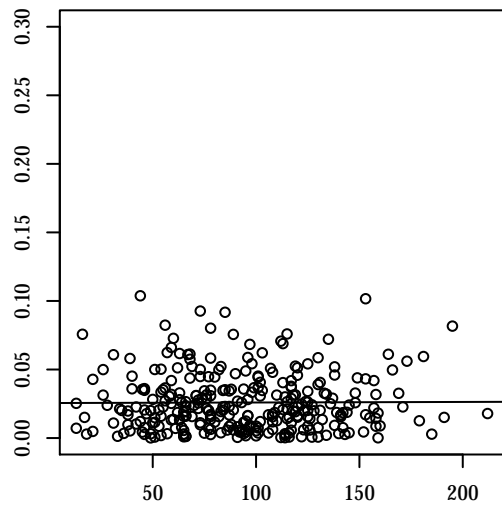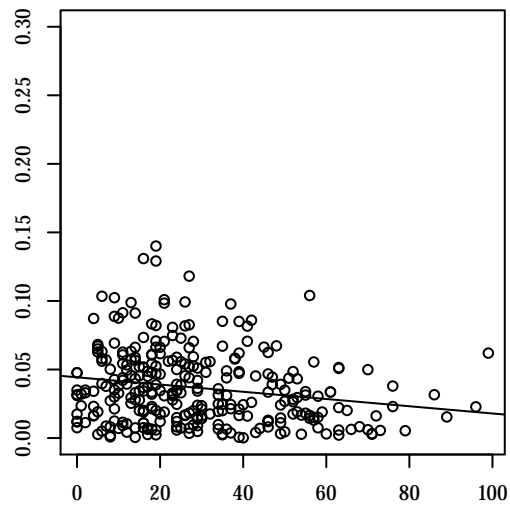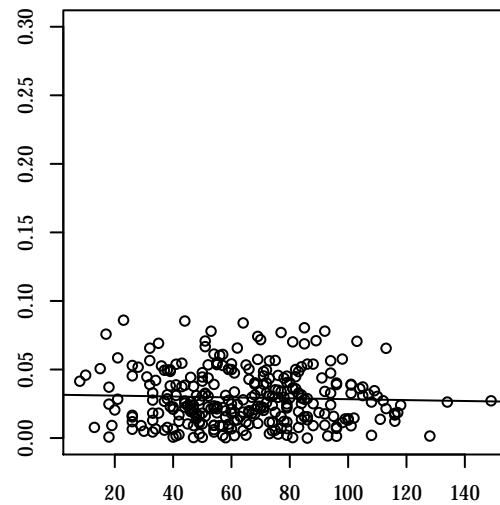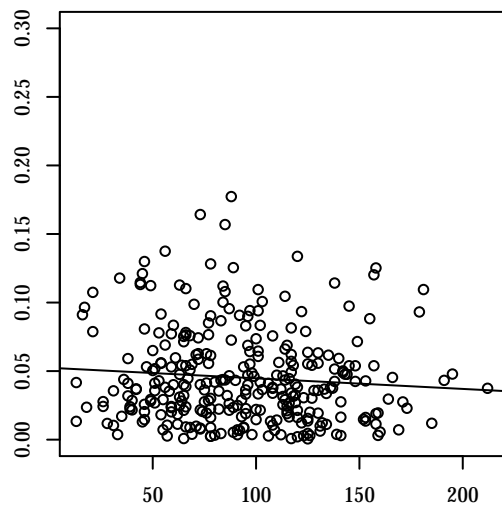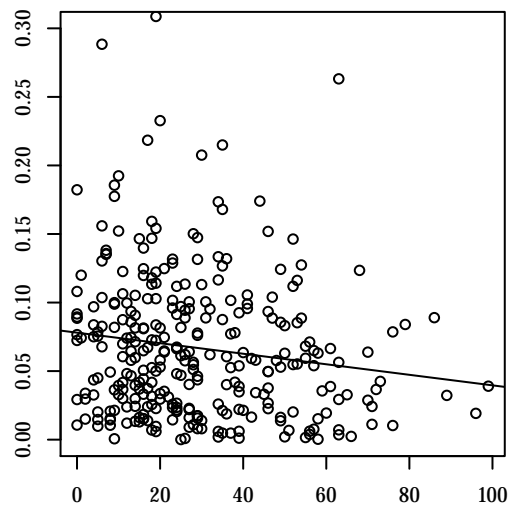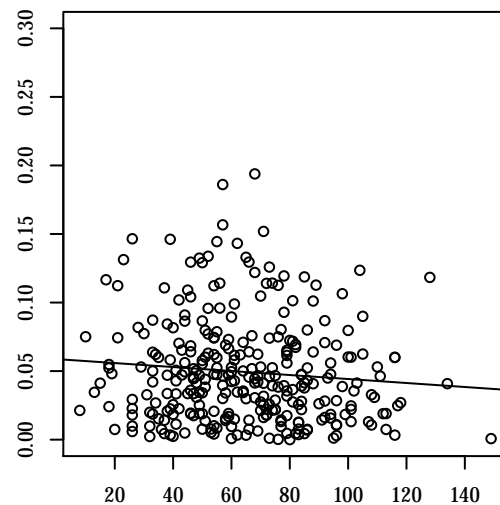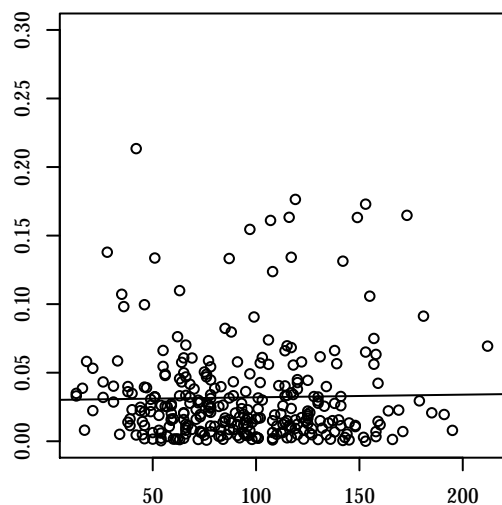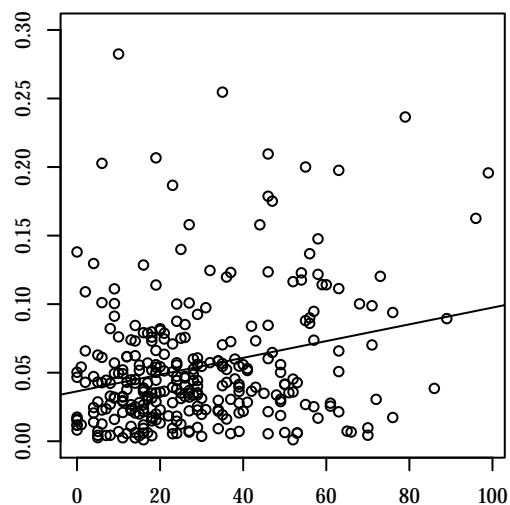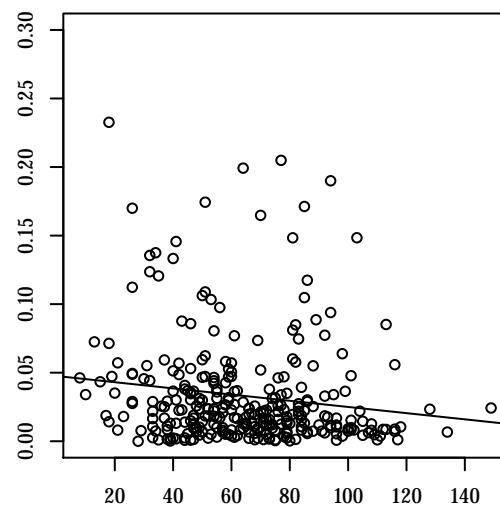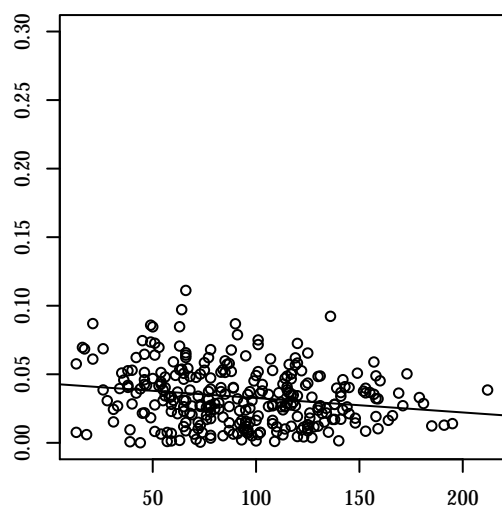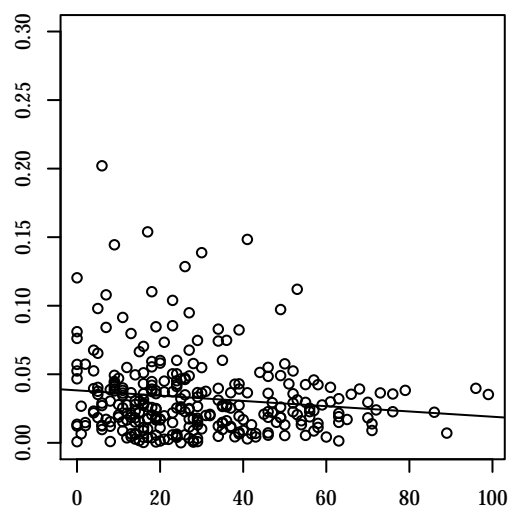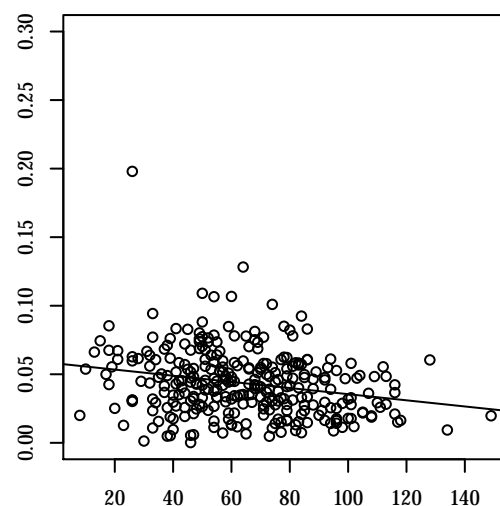

Supplement: Supplementary file 5 [file constituencyprefs_appendix_blinded.zip]
