# Supplementary material
Source: publisher site journal article supplement (https://static.cambridge.org/content/id/urn:cambridge.org:id:article:S1047198700012936/resource/name/constituencyprefs_appendix_blinded.zip)
Supplement: Supplementary file 6 [file constituencyprefs_appendix_blinded.zip]

# APPENDIX

## ESTIMATING CONSTITUENCY PREFERENCES FROM SPARSE SURVEY DATA USING AUXILIARY GEOGRAPHIC INFORMATION

FIGURE 1: Medians of the parameters' posterior probability with 90% credible interval, face-to-face data

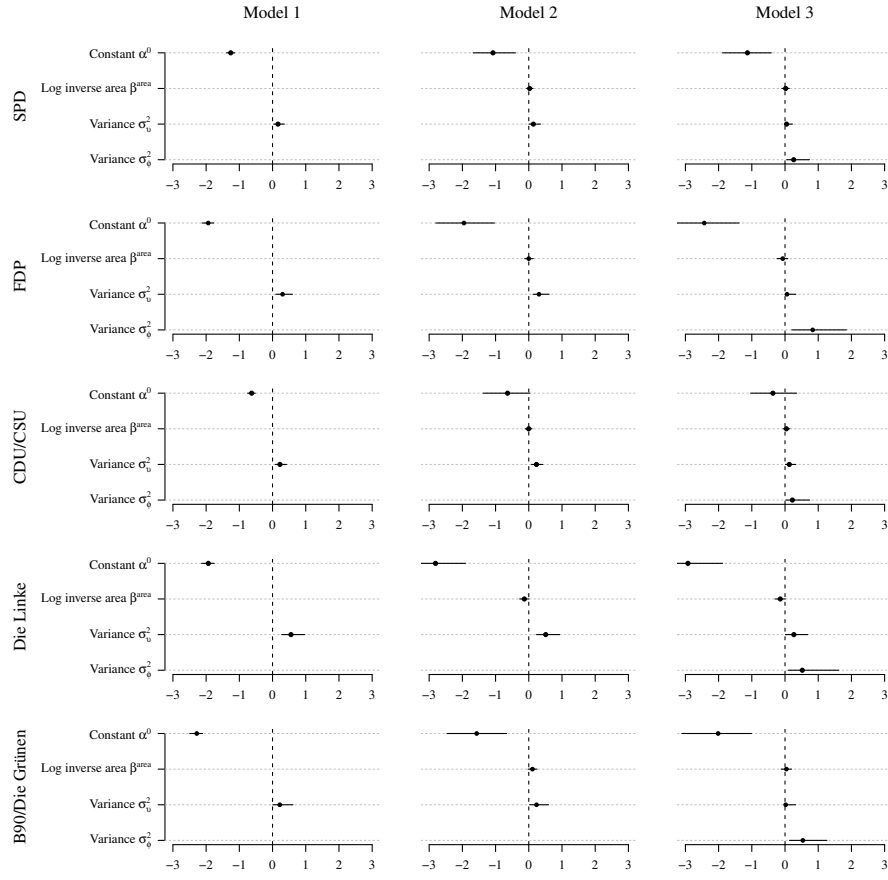

FIGURE 2: Medians of the parameters' posterior probability with 90% credible interval, CATI data

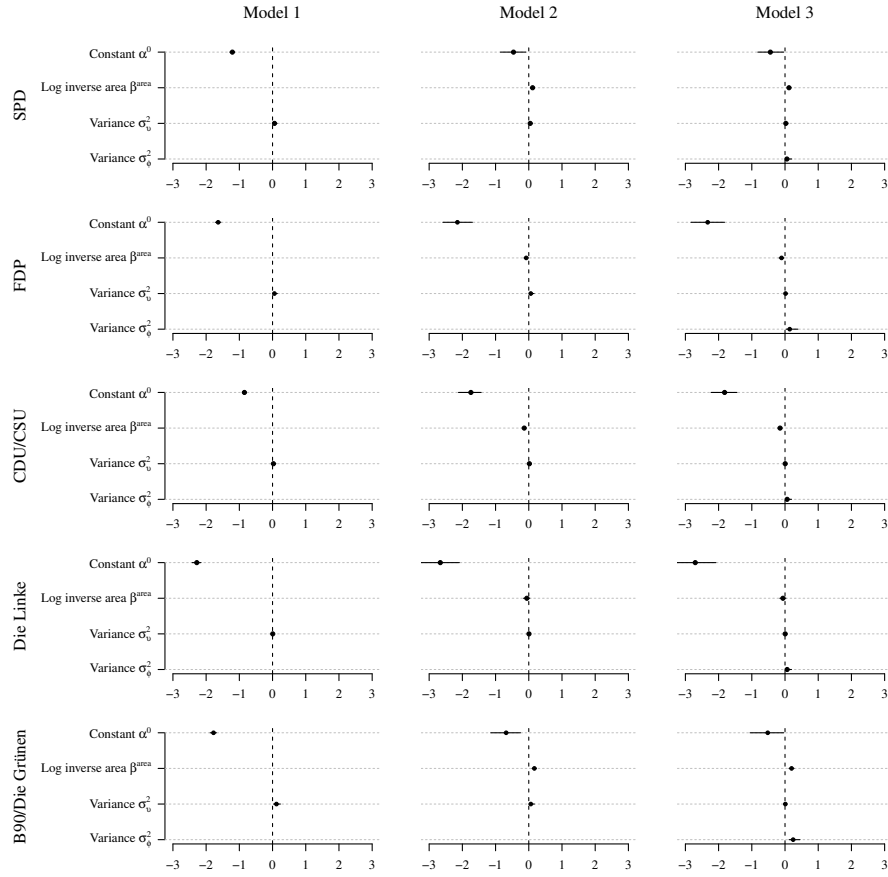

FIGURE 3: MAE vs. number of observations in district, pooled data

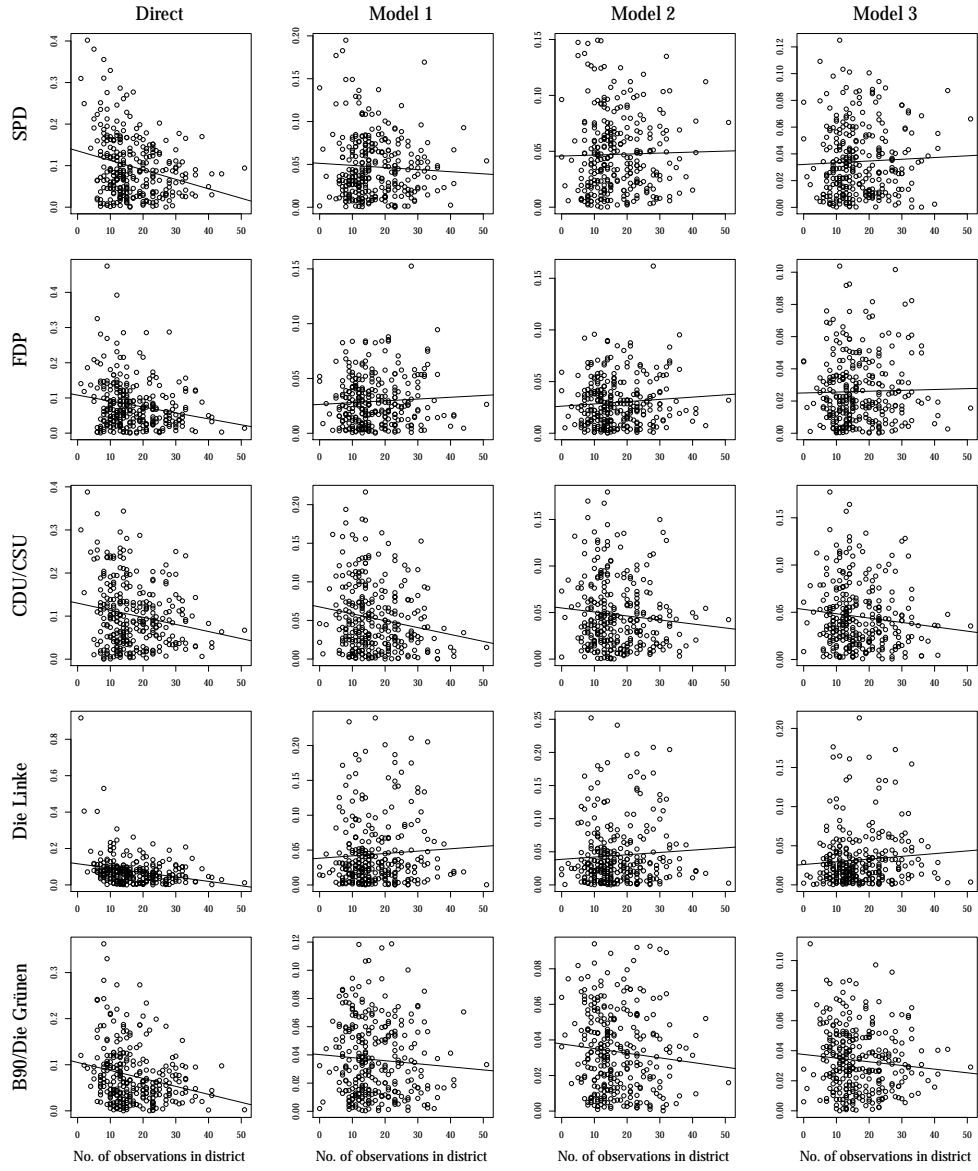

FIGURE 4: MAE (CAR-specified model) vs. number of observations in neighbor districts

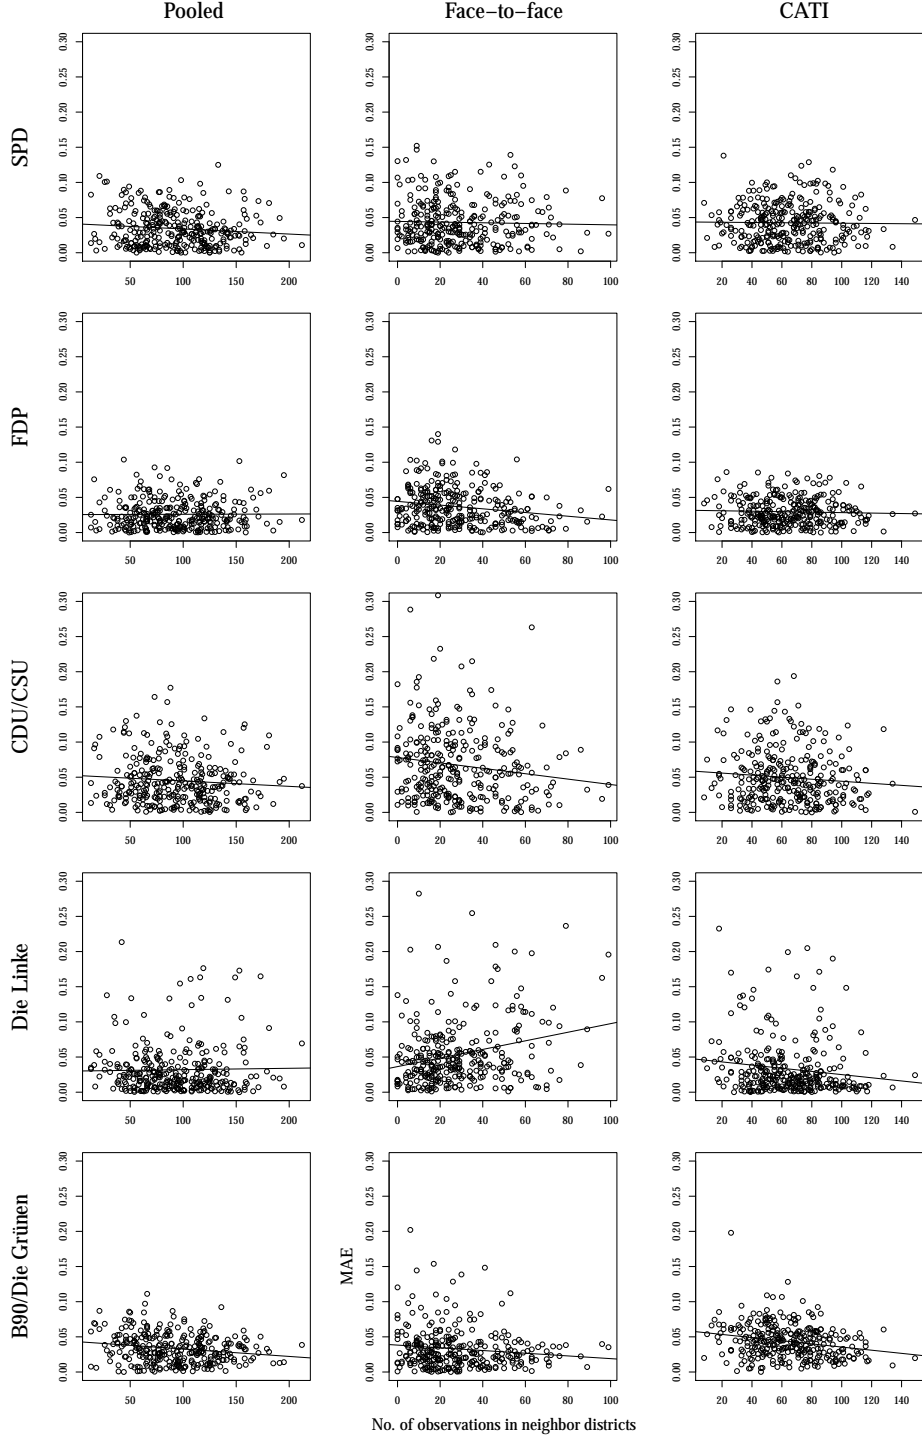

FIGURE 5: Validation results: medians of the parameters' posterior probability with 90% credible interval, for the Park et al.'s (2004) original model, and an alternative model replacing the regional RE with a CAR-structured (but regionally limited) RE.

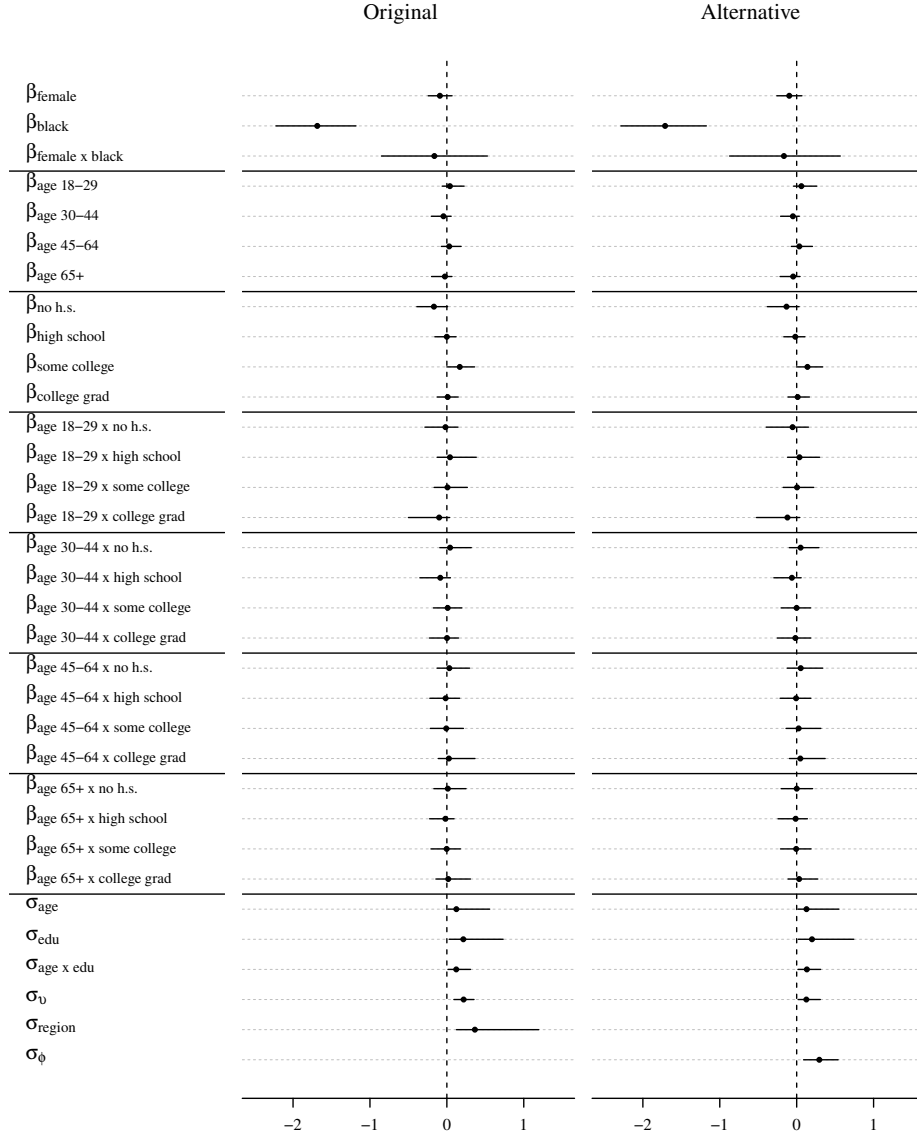

## REFERENCES

- Park, David K., Andrew Gelman and Joseph Bafumi. 2004. "Bayesian Multilevel Estimation with Poststratification: State-Level Estimates from National Polls." *Political Analysis* 12:375–385.
