# Supplementary material
Source: publisher site journal article supplement (https://static.cambridge.org/content/id/urn:cambridge.org:id:article:S1047198700012936/resource/name/constituencyprefs_appendix_blinded.zip)

Original

Alternative

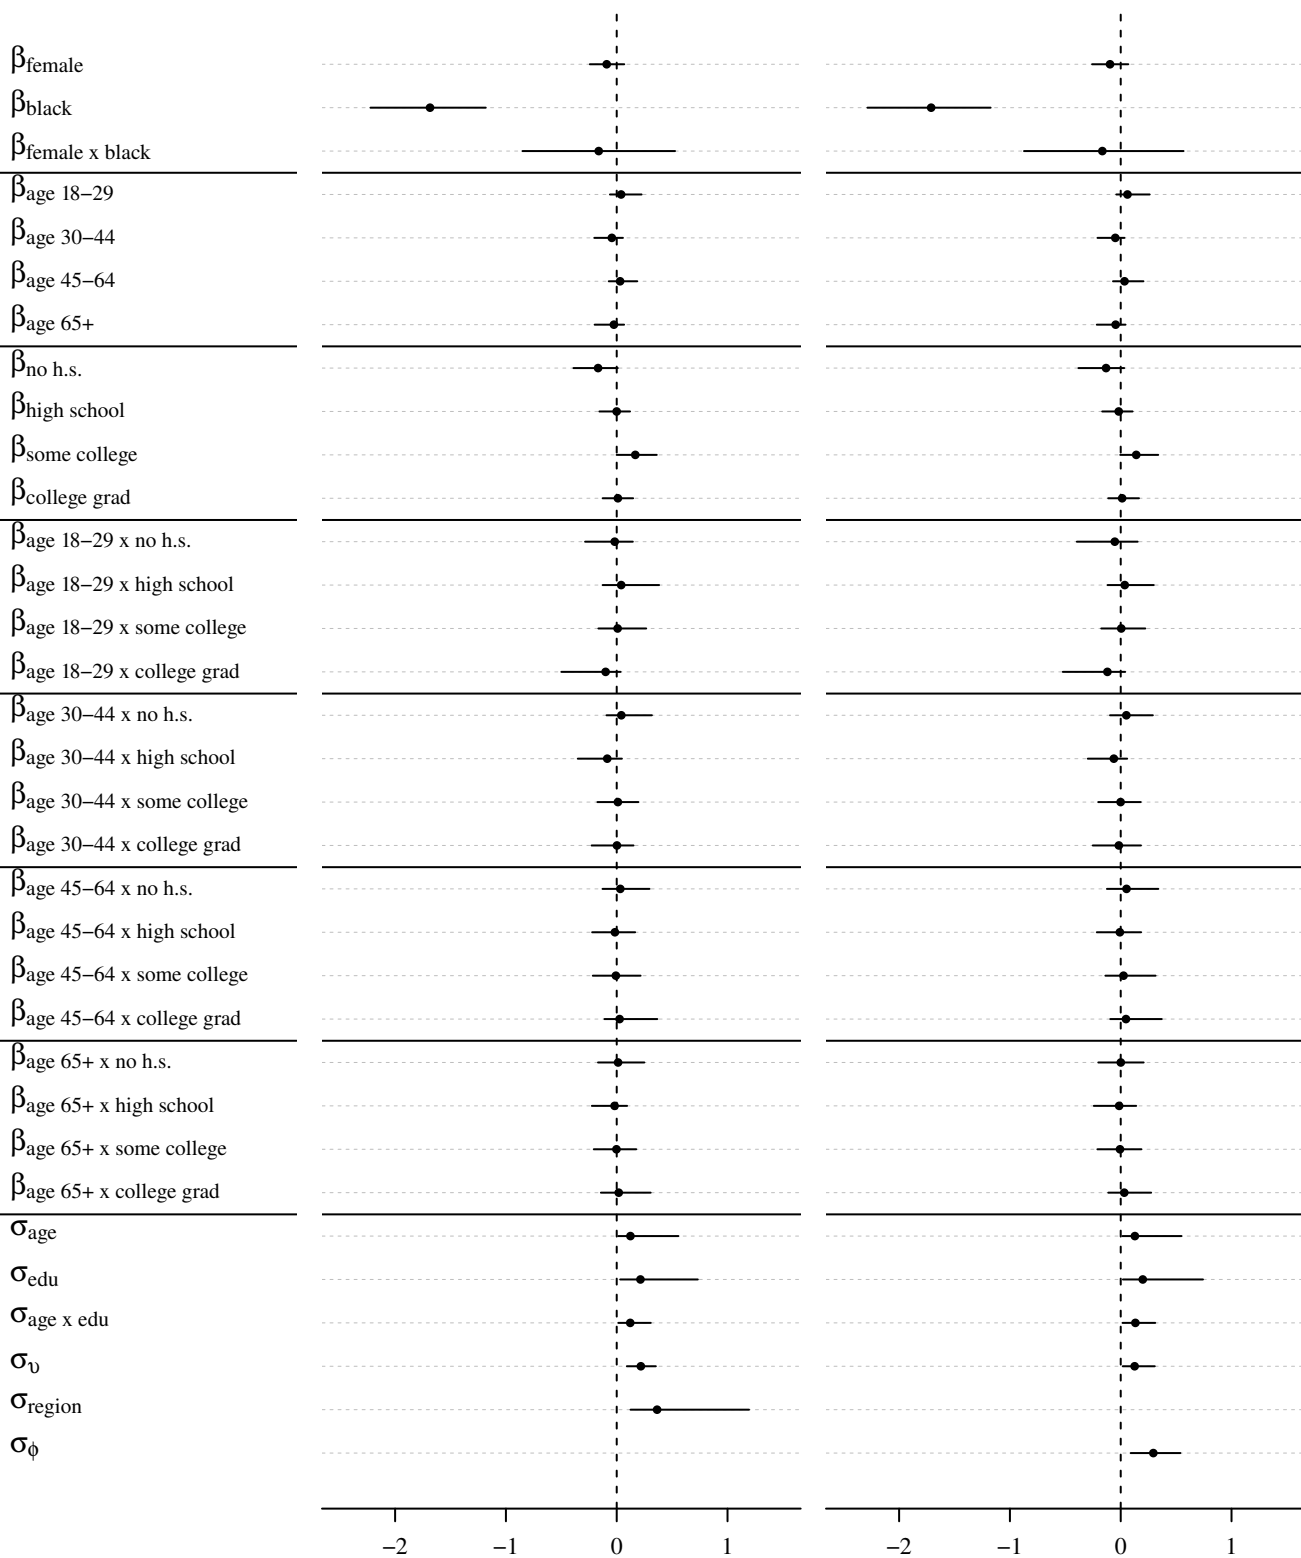

Supplement: Supplementary file 2 [file constituencyprefs_appendix_blinded.zip]
